# Supplementary material
Source: HighWire-hosted journal article supplement (https://cmaj.ca/highwire/filestream/59596/field_highwire_adjunct_files/8/150771-res-Appendix_7.pdf)
Supplement: 150771-res-Appendix_7.pdf [file 150771-res-Appendix_7.pdf]

**Appendix 7 (as supplied by the authors): Subgroup analysis of Risk of Ischemic Stroke Among Patients Using ARBs and ACEIs**

| <b>Characteristic</b>                   | <b>Hazard Ratio*<br/>(95% CI)</b> | <b>P Value</b> | <b>Interaction<br/>P Value</b> |
|-----------------------------------------|-----------------------------------|----------------|--------------------------------|
| <b>Gender</b>                           |                                   |                |                                |
| Male                                    | 0.964 (0.838-1.108)               | 0.6            | 0.5                            |
| Female                                  | 0.801 (0.769-1.055)               | 0.2            |                                |
| <b>Age</b>                              |                                   |                |                                |
| 20-64 years                             | 0.867 (0.755-0.995)               | 0.04           | 0.08                           |
| ≥ 65 years                              | 1.043 (0.888-1.224)               | 0.6            |                                |
| <b>Charlson Comorbidity Index score</b> |                                   |                |                                |
| 2                                       | 1.018 (0.841-1.231)               | 0.9            | 0.03                           |
| 3                                       | 0.769 (0.609-0.972)               | 0.03           |                                |
| 4                                       | 0.765 (0.591-0.989)               | 0.04           |                                |
| ≥ 5                                     | 1.094 (0.911-1.315)               | 0.3            |                                |
| <b>Hypertension</b>                     |                                   |                |                                |
| Yes                                     | 0.949 (0.851-1.058)               | 0.3            | 0.5                            |
| No                                      | 0.831 (0.571-1.210)               | 0.3            |                                |
| <b>Chronic kidney disease</b>           |                                   |                |                                |
| Yes                                     | 1.167 (0.921-1.478)               | 0.2            | 0.05                           |
| No                                      | 0.892 (0.794-1.003)               | 0.06           |                                |
| <b>Heart failure</b>                    |                                   |                |                                |
| Yes                                     | 0.965 (0.722-1.289)               | 0.8            | 0.8                            |
| No                                      | 0.933 (0.834-1.044)               | 0.2            |                                |
| <b>Coronary artery disease</b>          |                                   |                |                                |
| Yes                                     | 0.990 (0.834-1.175)               | 0.9            | 0.4                            |
| No                                      | 0.911 (0.798-1.039)               | 0.2            |                                |

\* Adjusted for propensity score; ACEI cohort: reference group

Abbreviations: CI, confidence interval; ARB, Angiotensin II receptor blockers; ACEI, angiotensin-converting-enzyme inhibitors, ; RAAS, Renin-angiotensin-aldosterone system.
